# Supplementary material
Source: publisher figshare collection journal article supplement (https://acs.figshare.com/ndownloader/files/4123828)
Supplement: Supplementary file 1 [file 4123828]

# Supporting Information

## Fluorinated Carbazole Derivatives as Wide-Energy-Gap Host Material for Blue Phosphorescent Organic Light-Emitting Diode

*Yukitami Mizuno,\*† Isao Takasu,† Shuichi Uchikoga,† Shintaro Enomoto,† Tomoaki Sawabe,† Akio Amano,† Atsushi Wada,† Tomoko Sugizaki,† Jiro Yoshida,† Tomio Ono,† and Chihaya Adachi‡*

† Corporate Research & Development center, Toshiba Corp.

1, Komukai-Toshiba-cho, Saiwai-ku, Kawasaki, 212-8582 (Japan)

‡ Center for Future Chemistry, Kyushu University

744 Motooka, Nishi, Fukuoka 819-0395 (Japan)

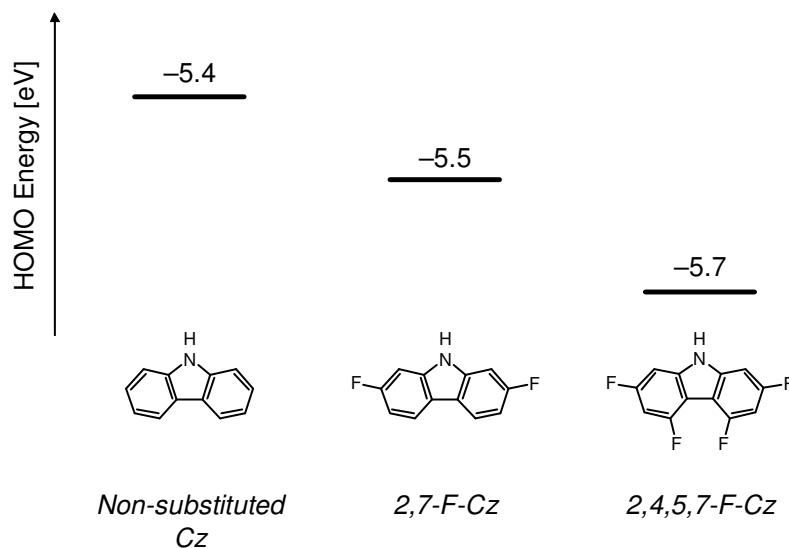

**Figure S1.** HOMO energy levels of non-substituted and fluorinated carbazoles. These data were estimated with photo-emission spectroscopy (Riken-Keiki, AC-3).
